# Supplementary material for: A Single Vibrionales 16S rRNA Oligotype Dominates the Intestinal Microbiome in Two Geographically Separated Atlantic cod Populations
Source: Front Microbiol. 2018 Jul 13;9:1561. doi: 10.3389/fmicb.2018.01561 (PMC6053498; doi:10.3389/fmicb.2018.01561)
Supplement: Supplementary file 2 [file Table_2.XLSX]

## Sheet: Primers and barcodes
Table S2: Primers and barcodes
Primer sequences and unique barcode for each sample.
		Forward primer name	Forward primer sequence
		515f	GTGCCAGCMGCCGCGGTAA
Triplicate #	Experiment sample name	Reverse primer name	Sequencing sample name	Reverse PCR primer sequence	Index sequence	Comment
1	L0814_25G1	806rcbc0	Pilot_exp_01	CAA GCA GAA GAC GGC ATA CGA GAT TCC CTT GTC TCC AGT CAG TCA GCC GGA CTA CHV GGG TWT CTA AT	GGAGACAAGGGA
1	L0814_25G2	806rcbc1	Pilot_exp_02	CAA GCA GAA GAC GGC ATA CGA GAT ACG AGA CTG ATT AGT CAG TCA GCC GGA CTA CHV GGG TWT CTA AT	AATCAGTCTCGT
1	L0814_25G3	806rcbc2	Pilot_exp_03	CAA GCA GAA GAC GGC ATA CGA GAT GCT GTA CGG ATT AGT CAG TCA GCC GGA CTA CHV GGG TWT CTA AT	AATCCGTACAGC
2	L0814_25M1	806rcbc3	Pilot_exp_04	CAA GCA GAA GAC GGC ATA CGA GAT ATC ACC AGG TGT AGT CAG TCA GCC GGA CTA CHV GGG TWT CTA AT	ACACCTGGTGAT
2	L0814_25M2	806rcbc4	Pilot_exp_05	CAA GCA GAA GAC GGC ATA CGA GAT TGG TCA ACG ATA AGT CAG TCA GCC GGA CTA CHV GGG TWT CTA AT	TATCGTTGACCA
2	L0814_25M3	806rcbc5	Pilot_exp_06	CAA GCA GAA GAC GGC ATA CGA GAT ATC GCA CAG TAA AGT CAG TCA GCC GGA CTA CHV GGG TWT CTA AT	TTACTGTGCGAT
3	L0814_37G1	806rcbc6	Pilot_exp_07	CAA GCA GAA GAC GGC ATA CGA GAT GTC GTG TAG CCT AGT CAG TCA GCC GGA CTA CHV GGG TWT CTA AT	AGGCTACACGAC
3	L0814_37G2	806rcbc7	Pilot_exp_08	CAA GCA GAA GAC GGC ATA CGA GAT AGC GGA GGT TAG AGT CAG TCA GCC GGA CTA CHV GGG TWT CTA AT	CTAACCTCCGCT
3	L0814_37G3	806rcbc8	Pilot_exp_09	CAA GCA GAA GAC GGC ATA CGA GAT ATC CTT TGG TTC AGT CAG TCA GCC GGA CTA CHV GGG TWT CTA AT	GAACCAAAGGAT
4	L0814_37M1	806rcbc9	Pilot_exp_10	CAA GCA GAA GAC GGC ATA CGA GAT TAC AGC GCA TAC AGT CAG TCA GCC GGA CTA CHV GGG TWT CTA AT	GTATGCGCTGTA
4	L0814_37M2	806rcbc10	Pilot_exp_11	CAA GCA GAA GAC GGC ATA CGA GAT ACC GGT ATG TAC AGT CAG TCA GCC GGA CTA CHV GGG TWT CTA AT	GTACATACCGGT
4	L0814_37M3	806rcbc11	Pilot_exp_12	CAA GCA GAA GAC GGC ATA CGA GAT AAT TGT GTC GGA AGT CAG TCA GCC GGA CTA CHV GGG TWT CTA AT	TCCGACACAATT
5	L0814_27G1	806rcbc12	Pilot_exp_13	CAA GCA GAA GAC GGC ATA CGA GAT TGC ATA CAC TGG AGT CAG TCA GCC GGA CTA CHV GGG TWT CTA AT	CCAGTGTATGCA
5	L0814_27G2	806rcbc13	Pilot_exp_14	CAA GCA GAA GAC GGC ATA CGA GAT AGT CGA ACG AGG AGT CAG TCA GCC GGA CTA CHV GGG TWT CTA AT	CCTCGTTCGACT
5	L0814_27G3	806rcbc14	Pilot_exp_15	CAA GCA GAA GAC GGC ATA CGA GAT ACC AGT GAC TCA AGT CAG TCA GCC GGA CTA CHV GGG TWT CTA AT	TGAGTCACTGGT
6	L0814_27M1	806rcbc15	Pilot_exp_16	CAA GCA GAA GAC GGC ATA CGA GAT GAA TAC CAA GTC AGT CAG TCA GCC GGA CTA CHV GGG TWT CTA AT	GACTTGGTATTC
6	L0814_27M2	806rcbc16	Pilot_exp_17	CAA GCA GAA GAC GGC ATA CGA GAT GTA GAT CGT GTA AGT CAG TCA GCC GGA CTA CHV GGG TWT CTA AT	TACACGATCTAC
6	L0814_27M3	806rcbc17	Pilot_exp_18	CAA GCA GAA GAC GGC ATA CGA GAT TAA CGT GTG TGC AGT CAG TCA GCC GGA CTA CHV GGG TWT CTA AT	GCACACACGTTA
7	L0814_28G1	806rcbc18	Pilot_exp_19	CAA GCA GAA GAC GGC ATA CGA GAT CAT TAT GGC GTG AGT CAG TCA GCC GGA CTA CHV GGG TWT CTA AT	CACGCCATAATG
7	L0814_28G2	806rcbc19	Pilot_exp_20	CAA GCA GAA GAC GGC ATA CGA GAT CCA ATA CGC CTG AGT CAG TCA GCC GGA CTA CHV GGG TWT CTA AT	CAGGCGTATTGG
7	L0814_28G3	806rcbc20	Pilot_exp_21	CAA GCA GAA GAC GGC ATA CGA GAT GAT CTG CGA TCC AGT CAG TCA GCC GGA CTA CHV GGG TWT CTA AT	GGATCGCAGATC
8	L0814_28M1	806rcbc21	Pilot_exp_22	CAA GCA GAA GAC GGC ATA CGA GAT CAG CTC ATC AGC AGT CAG TCA GCC GGA CTA CHV GGG TWT CTA AT	GCTGATGAGCTG
8	L0814_28M2	806rcbc22	Pilot_exp_23	CAA GCA GAA GAC GGC ATA CGA GAT CAA ACA ACA GCT AGT CAG TCA GCC GGA CTA CHV GGG TWT CTA AT	AGCTGTTGTTTG
8	L0814_28M3	806rcbc23	Pilot_exp_24	CAA GCA GAA GAC GGC ATA CGA GAT GCA ACA CCA TCC AGT CAG TCA GCC GGA CTA CHV GGG TWT CTA AT	GGATGGTGTTGC
9	L0814_29A1	806rcbc24	Pilot_exp_25	CAA GCA GAA GAC GGC ATA CGA GAT GCG ATA TAT CGC AGT CAG TCA GCC GGA CTA CHV GGG TWT CTA AT	GCGATATATCGC
9	L0814_29A2	806rcbc25	Pilot_exp_26	CAA GCA GAA GAC GGC ATA CGA GAT CGA GCA ATC CTA AGT CAG TCA GCC GGA CTA CHV GGG TWT CTA AT	TAGGATTGCTCG
9	L0814_29A3	806rcbc26	Pilot_exp_27	CAA GCA GAA GAC GGC ATA CGA GAT AGT CGT GCA CAT AGT CAG TCA GCC GGA CTA CHV GGG TWT CTA AT	ATGTGCACGACT
10	L0814_30A2	806rcbc28	Pilot_exp_29	CAA GCA GAA GAC GGC ATA CGA GAT CGA GGG AAA GTC AGT CAG TCA GCC GGA CTA CHV GGG TWT CTA AT	GACTTTCCCTCG
10	L0814_30A3	806rcbc29	Pilot_exp_30	CAA GCA GAA GAC GGC ATA CGA GAT CAA ATT CGG GAT AGT CAG TCA GCC GGA CTA CHV GGG TWT CTA AT	ATCCCGAATTTG
11	L0814_31A1	806rcbc30	Pilot_exp_31	CAA GCA GAA GAC GGC ATA CGA GAT AGA TTG ACC AAC AGT CAG TCA GCC GGA CTA CHV GGG TWT CTA AT	GTTGGTCAATCT
11	L0814_31A2	806rcbc31	Pilot_exp_32	CAA GCA GAA GAC GGC ATA CGA GAT AGT TAC GAG CTA AGT CAG TCA GCC GGA CTA CHV GGG TWT CTA AT	TAGCTCGTAACT
11	L0814_31A3	806rcbc32	Pilot_exp_33	CAA GCA GAA GAC GGC ATA CGA GAT GCA TAT GCA CTG AGT CAG TCA GCC GGA CTA CHV GGG TWT CTA AT	CAGTGCATATGC
12	L0814_41A1	806rcbc33	Pilot_exp_34	CAA GCA GAA GAC GGC ATA CGA GAT CAA CTC CCG TGA AGT CAG TCA GCC GGA CTA CHV GGG TWT CTA AT	TCACGGGAGTTG
12	L0814_41A2	806rcbc34	Pilot_exp_35	CAA GCA GAA GAC GGC ATA CGA GAT TTG CGT TAG CAG AGT CAG TCA GCC GGA CTA CHV GGG TWT CTA AT	CTGCTAACGCAA
12	L0814_41A3	806rcbc35	Pilot_exp_36	CAA GCA GAA GAC GGC ATA CGA GAT TAC GAG CCC TAA AGT CAG TCA GCC GGA CTA CHV GGG TWT CTA AT	TTAGGGCTCGTA
13	L0814_33A1	806rcbc36	Pilot_exp_37	CAA GCA GAA GAC GGC ATA CGA GAT CAC TAC GCT AGA AGT CAG TCA GCC GGA CTA CHV GGG TWT CTA AT	TCTAGCGTAGTG
13	L0814_33A2	806rcbc37	Pilot_exp_38	CAA GCA GAA GAC GGC ATA CGA GAT TGC AGT CCT CGA AGT CAG TCA GCC GGA CTA CHV GGG TWT CTA AT	TCGAGGACTGCA
13	L0814_33A3	806rcbc38	Pilot_exp_39	CAA GCA GAA GAC GGC ATA CGA GAT ACC ATA GCT CCG AGT CAG TCA GCC GGA CTA CHV GGG TWT CTA AT	CGGAGCTATGGT
14	L0814_34A1	806rcbc39	Pilot_exp_40	CAA GCA GAA GAC GGC ATA CGA GAT TCG ACA TCT CTT AGT CAG TCA GCC GGA CTA CHV GGG TWT CTA AT	AAGAGATGTCGA
14	L0814_34A2	806rcbc40	Pilot_exp_41	CAA GCA GAA GAC GGC ATA CGA GAT GAA CAC TTT GGA AGT CAG TCA GCC GGA CTA CHV GGG TWT CTA AT	TCCAAAGTGTTC
14	L0814_34A3	806rcbc41	Pilot_exp_42	CAA GCA GAA GAC GGC ATA CGA GAT GAG CCA TCT GTA AGT CAG TCA GCC GGA CTA CHV GGG TWT CTA AT	TACAGATGGCTC
15	L0814_35A1	806rcbc42	Pilot_exp_43	CAA GCA GAA GAC GGC ATA CGA GAT TTG GGT ACA CGT AGT CAG TCA GCC GGA CTA CHV GGG TWT CTA AT	ACGTGTACCCAA
15	L0814_35A2	806rcbc43	Pilot_exp_44	CAA GCA GAA GAC GGC ATA CGA GAT AAG GCG CTC CTT AGT CAG TCA GCC GGA CTA CHV GGG TWT CTA AT	AAGGAGCGCCTT
15	L0814_35A3	806rcbc44	Pilot_exp_45	CAA GCA GAA GAC GGC ATA CGA GAT TAA TAC GGA TCG AGT CAG TCA GCC GGA CTA CHV GGG TWT CTA AT	CGATCCGTATTA
16	L0814_44A1	806rcbc45	Pilot_exp_46	CAA GCA GAA GAC GGC ATA CGA GAT TCG GAA TTA GAC AGT CAG TCA GCC GGA CTA CHV GGG TWT CTA AT	GTCTAATTCCGA
16	L0814_44A2	806rcbc46	Pilot_exp_47	CAA GCA GAA GAC GGC ATA CGA GAT TGT GAA TTC GGA AGT CAG TCA GCC GGA CTA CHV GGG TWT CTA AT	TCCGAATTCACA
16	L0814_44A3	806rcbc47	Pilot_exp_48	CAA GCA GAA GAC GGC ATA CGA GAT CAT TCG TGG CGT AGT CAG TCA GCC GGA CTA CHV GGG TWT CTA AT	ACGCCACGAATG
18	S0913_35M1	806rcbc53	Pilot_exp_54	CAA GCA GAA GAC GGC ATA CGA GAT ATG ATG AGC CTC AGT CAG TCA GCC GGA CTA CHV GGG TWT CTA AT	GAGGCTCATCAT
19	S0913_26G1	806rcbc54	Pilot_exp_55	CAA GCA GAA GAC GGC ATA CGA GAT GTC GAC AGA GGA AGT CAG TCA GCC GGA CTA CHV GGG TWT CTA AT	TCCTCTGTCGAC
19	S0913_26G2	806rcbc55	Pilot_exp_56	CAA GCA GAA GAC GGC ATA CGA GAT TGT CGC AAA TAG AGT CAG TCA GCC GGA CTA CHV GGG TWT CTA AT	CTATTTGCGACA
20	S0913_26M1	806rcbc57	Pilot_exp_58	CAA GCA GAA GAC GGC ATA CGA GAT TAT ACC GCT GCG AGT CAG TCA GCC GGA CTA CHV GGG TWT CTA AT	CGCAGCGGTATA
20	S0913_26M2	806rcbc58	Pilot_exp_59	CAA GCA GAA GAC GGC ATA CGA GAT AGT TGA GGC ATT AGT CAG TCA GCC GGA CTA CHV GGG TWT CTA AT	AATGCCTCAACT
20	S0913_26M3	806rcbc59	Pilot_exp_60	CAA GCA GAA GAC GGC ATA CGA GAT ACA ATA GAC ACC AGT CAG TCA GCC GGA CTA CHV GGG TWT CTA AT	GGTGTCTATTGT
21	S0913_27G1	806rcbc60	Pilot_exp_61	CAA GCA GAA GAC GGC ATA CGA GAT CGG TCA ATT GAC AGT CAG TCA GCC GGA CTA CHV GGG TWT CTA AT	GTCAATTGACCG
21	S0913_27G2	806rcbc61	Pilot_exp_62	CAA GCA GAA GAC GGC ATA CGA GAT GTG GAG TCT CAT AGT CAG TCA GCC GGA CTA CHV GGG TWT CTA AT	ATGAGACTCCAC
21	S0913_27G3	806rcbc62	Pilot_exp_63	CAA GCA GAA GAC GGC ATA CGA GAT GCT CGA AGA TTC AGT CAG TCA GCC GGA CTA CHV GGG TWT CTA AT	GAATCTTCGAGC
22	S0913_27M1	806rcbc63	Pilot_exp_64	CAA GCA GAA GAC GGC ATA CGA GAT AGG CTT ACG TGT AGT CAG TCA GCC GGA CTA CHV GGG TWT CTA AT	ACACGTAAGCCT
22	S0913_27M2	806rcbc64	Pilot_exp_65	CAA GCA GAA GAC GGC ATA CGA GAT TCT CTA CCA CTC AGT CAG TCA GCC GGA CTA CHV GGG TWT CTA AT	GAGTGGTAGAGA
22	S0913_27M3	806rcbc65	Pilot_exp_66	CAA GCA GAA GAC GGC ATA CGA GAT ACT TCC AAC TTC AGT CAG TCA GCC GGA CTA CHV GGG TWT CTA AT	GAAGTTGGAAGT
23	S0913_31G1	806rcbc66	Pilot_exp_67	CAA GCA GAA GAC GGC ATA CGA GAT CTC ACC TAG GAA AGT CAG TCA GCC GGA CTA CHV GGG TWT CTA AT	TTCCTAGGTGAG
23	S0913_31G2	806rcbc67	Pilot_exp_68	CAA GCA GAA GAC GGC ATA CGA GAT GTG TTG TCG TGC AGT CAG TCA GCC GGA CTA CHV GGG TWT CTA AT	GCACGACAACAC
23	S0913_31G3	806rcbc68	Pilot_exp_69	CAA GCA GAA GAC GGC ATA CGA GAT CCA CAG ATC GAT AGT CAG TCA GCC GGA CTA CHV GGG TWT CTA AT	ATCGATCTGTGG
24	S0913_31M1	806rcbc69	Pilot_exp_70	CAA GCA GAA GAC GGC ATA CGA GAT TAT CGA CAC AAG AGT CAG TCA GCC GGA CTA CHV GGG TWT CTA AT	CTTGTGTCGATA
24	S0913_31M2	806rcbc70	Pilot_exp_71	CAA GCA GAA GAC GGC ATA CGA GAT GAT TCC GGC TCA AGT CAG TCA GCC GGA CTA CHV GGG TWT CTA AT	TGAGCCGGAATC
24	S0913_31M3	806rcbc71	Pilot_exp_72	CAA GCA GAA GAC GGC ATA CGA GAT CGT AAT TGC CGC AGT CAG TCA GCC GGA CTA CHV GGG TWT CTA AT	GCGGCAATTACG
25	S0913_29A1	806rcbc72	Pilot_exp_73	CAA GCA GAA GAC GGC ATA CGA GAT GGT GAC TAG TTC AGT CAG TCA GCC GGA CTA CHV GGG TWT CTA AT	GAACTAGTCACC
25	S0913_29A2	806rcbc73	Pilot_exp_74	CAA GCA GAA GAC GGC ATA CGA GAT ATG GGT TCC GTC AGT CAG TCA GCC GGA CTA CHV GGG TWT CTA AT	GACGGAACCCAT
25	S0913_29A3	806rcbc74	Pilot_exp_75	CAA GCA GAA GAC GGC ATA CGA GAT TAG GCA TGC TTG AGT CAG TCA GCC GGA CTA CHV GGG TWT CTA AT	CAAGCATGCCTA
26	S0913_30A1	806rcbc75	Pilot_exp_76	CAA GCA GAA GAC GGC ATA CGA GAT AAC TAG TTC AGG AGT CAG TCA GCC GGA CTA CHV GGG TWT CTA AT	CCTGAACTAGTT
26	S0913_30A2	806rcbc76	Pilot_exp_77	CAA GCA GAA GAC GGC ATA CGA GAT ATT CTG CCG AAG AGT CAG TCA GCC GGA CTA CHV GGG TWT CTA AT	CTTCGGCAGAAT
26	S0913_30A3	806rcbc77	Pilot_exp_78	CAA GCA GAA GAC GGC ATA CGA GAT AGC ATG TCC CGT AGT CAG TCA GCC GGA CTA CHV GGG TWT CTA AT	ACGGGACATGCT
27	S0913_25A1	806rcbc78	Pilot_exp_79	CAA GCA GAA GAC GGC ATA CGA GAT GTA CGA TAT GAC AGT CAG TCA GCC GGA CTA CHV GGG TWT CTA AT	GTCATATCGTAC
27	S0913_25A2	806rcbc79	Pilot_exp_80	CAA GCA GAA GAC GGC ATA CGA GAT GTG GTG GTT TCC AGT CAG TCA GCC GGA CTA CHV GGG TWT CTA AT	GGAAACCACCAC
27	S0913_25A3	806rcbc80	Pilot_exp_81	CAA GCA GAA GAC GGC ATA CGA GAT TAG TAT GCG CAA AGT CAG TCA GCC GGA CTA CHV GGG TWT CTA AT	TTGCGCATACTA
28	S0913_32A1	806rcbc81	Pilot_exp_82	CAA GCA GAA GAC GGC ATA CGA GAT TGC GCT GAA TGT AGT CAG TCA GCC GGA CTA CHV GGG TWT CTA AT	ACATTCAGCGCA
28	S0913_32A2	806rcbc82	Pilot_exp_83	CAA GCA GAA GAC GGC ATA CGA GAT ATG GCT GTC AGT AGT CAG TCA GCC GGA CTA CHV GGG TWT CTA AT	ACTGACAGCCAT
28	S0913_32A3	806rcbc83	Pilot_exp_84	CAA GCA GAA GAC GGC ATA CGA GAT GTT CTC TTC TCG AGT CAG TCA GCC GGA CTA CHV GGG TWT CTA AT	CGAGAAGAGAAC
29	S0913_33A1	806rcbc84	Pilot_exp_85	CAA GCA GAA GAC GGC ATA CGA GAT CGT AAG ATG CCT AGT CAG TCA GCC GGA CTA CHV GGG TWT CTA AT	AGGCATCTTACG
29	S0913_33A2	806rcbc85	Pilot_exp_86	CAA GCA GAA GAC GGC ATA CGA GAT GCG TTC TAG CTG AGT CAG TCA GCC GGA CTA CHV GGG TWT CTA AT	CAGCTAGAACGC
29	S0913_33A3	806rcbc86	Pilot_exp_87	CAA GCA GAA GAC GGC ATA CGA GAT GTT GTT CTG GGA AGT CAG TCA GCC GGA CTA CHV GGG TWT CTA AT	TCCCAGAACAAC
30	S0913_34A1	806rcbc87	Pilot_exp_88	CAA GCA GAA GAC GGC ATA CGA GAT GGA CTT CCA GCT AGT CAG TCA GCC GGA CTA CHV GGG TWT CTA AT	AGCTGGAAGTCC
30	S0913_34A2	806rcbc88	Pilot_exp_89	CAA GCA GAA GAC GGC ATA CGA GAT CTC ACA ACC GTG AGT CAG TCA GCC GGA CTA CHV GGG TWT CTA AT	CACGGTTGTGAG
30	S0913_34A3	806rcbc89	Pilot_exp_90	CAA GCA GAA GAC GGC ATA CGA GAT CTG CTA TTC CTC AGT CAG TCA GCC GGA CTA CHV GGG TWT CTA AT	GAGGAATAGCAG
18	S0913_35M2	806rcbc90	Pilot_exp_91	CAA GCA GAA GAC GGC ATA CGA GAT ATG TCA CCG CTG AGT CAG TCA GCC GGA CTA CHV GGG TWT CTA AT	CAGCGGTGACAT
18	S0913_35M3	806rcbc91	Pilot_exp_92	CAA GCA GAA GAC GGC ATA CGA GAT TGT AAC GCC GAT AGT CAG TCA GCC GGA CTA CHV GGG TWT CTA AT	ATCGGCGTTACA
19	S0913_26G3	806rcbc93	Pilot_exp_94	CAA GCA GAA GAC GGC ATA CGA GAT TGG AGT AGG TGG AGT CAG TCA GCC GGA CTA CHV GGG TWT CTA AT	CCACCTACTCCA
	POS_3	806rcbc92	Pilot_exp_93	CAA GCA GAA GAC GGC ATA CGA GAT AGC AGA ACA TCT AGT CAG TCA GCC GGA CTA CHV GGG TWT CTA AT	AGATGTTCTGCT	Pos. control
	NTC	806rcbc94	Pilot_exp_95	CAA GCA GAA GAC GGC ATA CGA GAT TTG GCT CTA TTC AGT CAG TCA GCC GGA CTA CHV GGG TWT CTA AT	GAATAGAGCCAA	NTC
	NTC	806rcbc95	Pilot_exp_96	CAA GCA GAA GAC GGC ATA CGA GAT GAT CCC ACG TAC AGT CAG TCA GCC GGA CTA CHV GGG TWT CTA AT	GTACGTGGGATC	NTC
